# Supplementary material
Source: Research Square preprint supplement (doi:10.21203/rs.3.rs-9304233/v1)
Supplement: Supplementary file 1 [file e973ab674c3bdf12020bf13d.docx]

**
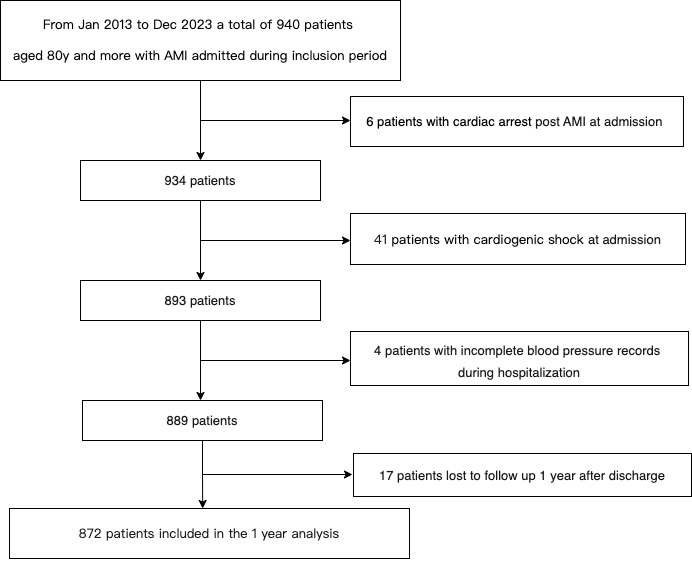
**

**Supplemental Fig 1.** Study flowchart.

**A All-cause mortality in 1 year B All-cause mortality in 1 month**

[
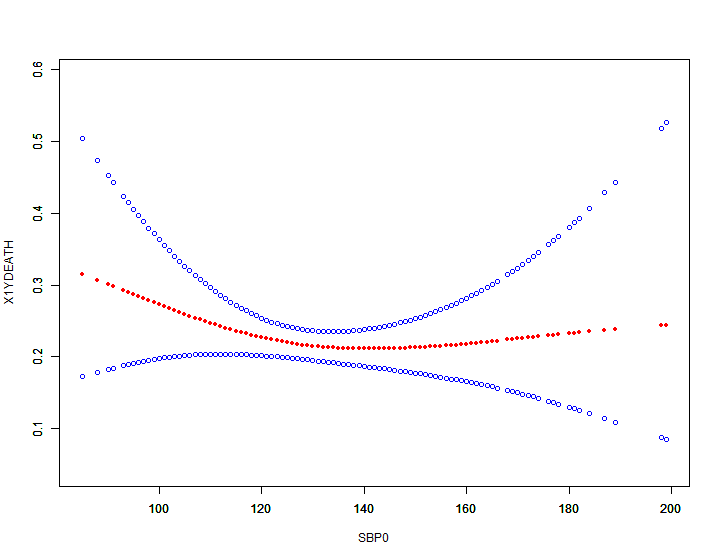
](http://127.0.0.1:17470/Analysis/A6/A6_1_tbl/A6_1_tbl_X1YDEATH_SBP0_smooth.png) [
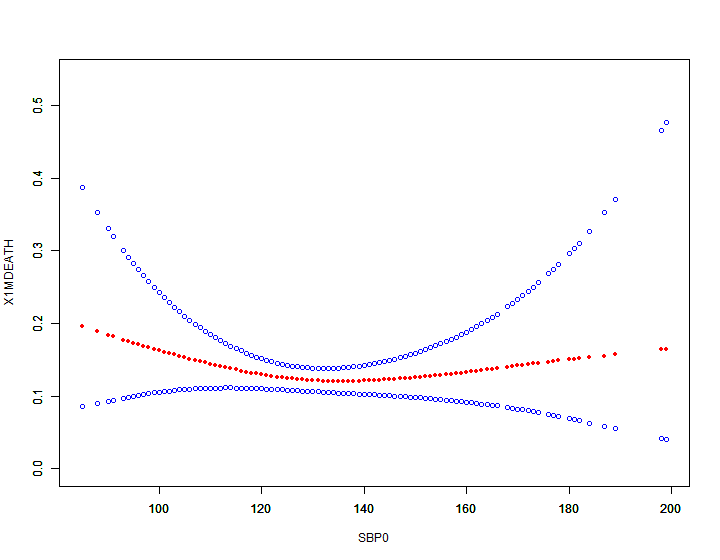
](http://127.0.0.1:17470/Analysis/A6/A6_1_tbl/A6_1_tbl_X1MDEATH_SBP0_smooth.png)

Adjusted Odd Ratio

Admission SBP（mm Hg）

Admission SBP（mm Hg）

Adjusted Odd Ratio

**C All-cause mortality in-hospital D Cardiac mortality in 1 year**

[
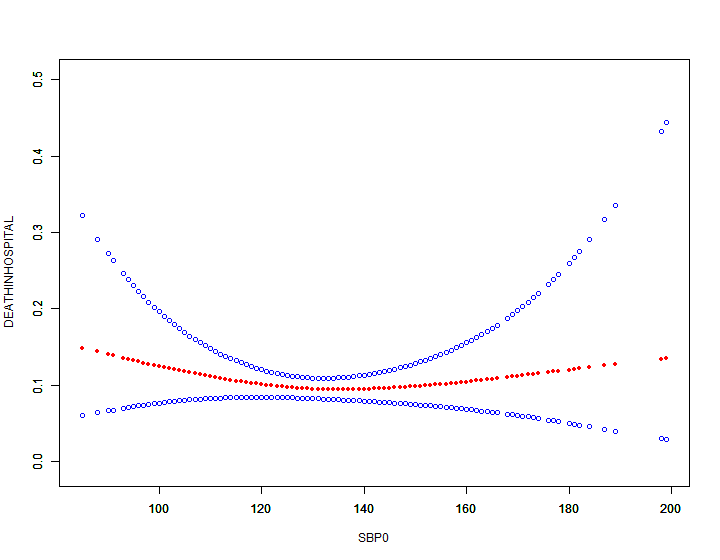
](http://127.0.0.1:17470/Analysis/A6/A6_1_tbl/A6_1_tbl_DEATHINHOSPITAL_SBP0_smooth.png) [
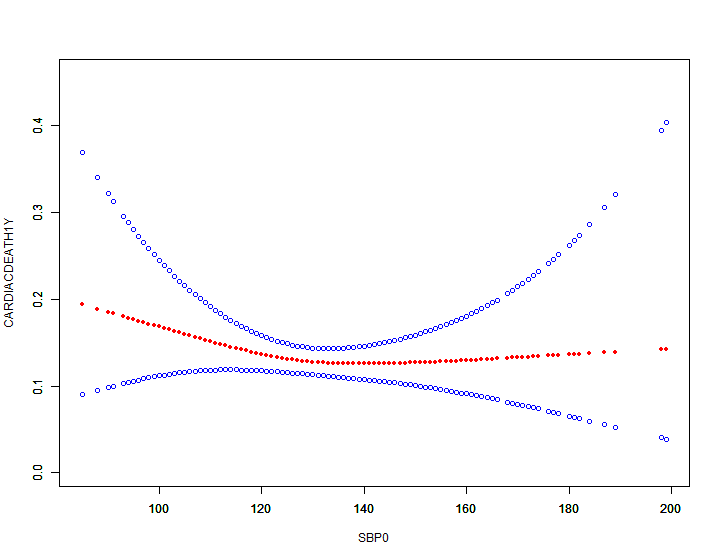
](http://127.0.0.1:17470/Analysis/A6/A6_1_tbl/A6_1_tbl_CARDIACDEATH1Y_SBP0_smooth.png)

Admission SBP（mm Hg）

Adjusted Odd Ratio

Admission SBP（mm Hg）

Adjusted Odd Ratio

**E Cardiac mortality in hospital**

[
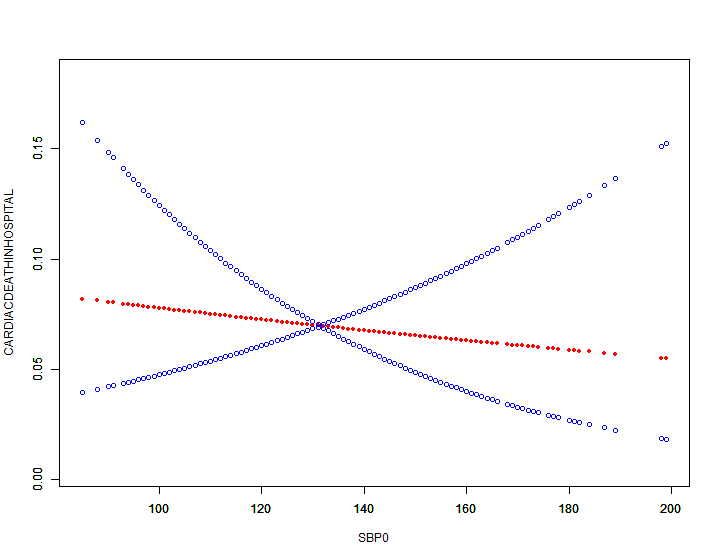
](http://127.0.0.1:17470/Analysis/A6/A6_1_tbl/A6_1_tbl_CARDIACDEATHINHOSPITAL_SBP0_smooth.png)

Adjusted Odd Ratio

Admission SBP（mm Hg）

**Supplemental Fig** **2.** The association between the admission SBP following acute myocardial infarction with the risk for all-cause mortality in 1 year (A), all-cause mortality in 1 month (B), all-cause mortality in-hospital (C), cardiac mortality in 1 year (D) and cardiac mortality in hospital (E) after multivariables adjustment.

**Supplemental Table 1. Association between change in SBP from pre-AMI home to in-hospital average and outcomes**

| **Primary and Secondary Outcomes** | **OR (95CI)** | ***P* value** | **OR (95CI)** | ***P* value** |
| --- | --- | --- | --- | --- |
| **Unadjusted** | | **Adjusted#** | |
| **Δ SBP*** | | | | |
| **all-cause mortality in 1 year** | 1.01 (0.99, 1.03) | 0.092 | 1.01 (0.99, 1.04) | 0.328 |
| **all-cause mortality in 1 month** | 1.02 (1.00, 1.04) | **0.024** | 1.04 (1.00, 1.07) | **0.032** |
| **all-cause mortality in-hospital** | 1.03 (1.00, 1.06) | **0.005** | 1.11(1.04, 1.18) | **0.002** |
| **cardiac mortality in 1 year** | 1.02 (0.98, 1.04) | 0.067 | 1.02 (0.98, 1.05) | 0.562 |
| **cardiac mortality in hospital** | 1.04 (1.01, 1.07) | **0.012** | 1.05 (1.01, 1.10) | **0.024** |

*Δ SBP* pre-AMI mean home SBP minus acute-phase in-hospital average SBP

# Adjusted for gender,age, AMI classification, smoking condition, alcohol consumption, history of hypertension, diabetes mellitus, previous myocardial infarction, previous cerebral infarction, chronic kidney disease, peripheral artery disease, previous PCI, previous CABG, HR at admission, cTnT max, NT-proBNP max, total cholesterol, HDL cholesterol, LDL cholesterol, triglycerides, HbA1c, Hct, PCI after AMI, complete coronary vascularization and hemorrhage events. CI indicates confidence interval; OR, odd ratio.
